# Supplementary material
Source: PubMed Central journal article supplement (PMC3482478)
Supplement: NIHMS349092-supplement-01.pdf [file NIHMS349092-supplement-01.pdf]

**Supplementary Table S1.** Observed ratios at varying nitroprotein content for differential N-dimethyl labeling after 1:1 split followed by enrichment of nitrated ubiquitin from human plasma<sup>a</sup>

| <b>Concentration of nitrated ubiquitin<br/>(pmol/mL)</b> | <b>Ratio<br/>(Experimental)</b> |
|----------------------------------------------------------|---------------------------------|
| 18                                                       | 1.24                            |
| 59                                                       | 0.87                            |
| 196                                                      | 0.88                            |
| 647                                                      | 1.11                            |
| <b>Average Ratio<sup>b</sup></b>                         | 1.03±0.09                       |

<sup>a</sup> Light:heavy ratio of <sup>#</sup>TLSDY<sup>\$</sup>NIQK from nitrated ubiquitin given as averages of duplicate measurements (<sup>#</sup> denotes N-dimethyl label, <sup>\$</sup> denotes 4-formylbenzoyl tag).

<sup>b</sup> Average ratio was calculated from experimental ratios of enriched nitrated ubiquitin spiked into human plasma proteins at four different concentrations.
